# Supplementary material
Source: PubMed Central journal article supplement (PMC7159299)
Supplement: mmc1.pdf [file mmc1.pdf]

# THE LANCET

## Supplementary appendix

This appendix formed part of the original submission and has been peer reviewed.  
We post it as supplied by the authors.

Supplement to: Huang C, Wang Y, Li X, et al. Clinical features of patients infected  
with 2019 novel coronavirus in Wuhan, China. *Lancet* 2020; published online Jan 24.  
[http://dx.doi.org/10.1016/S0140-6736\(20\)30183-5](http://dx.doi.org/10.1016/S0140-6736(20)30183-5).

**Supplementary Table 1.** Demographics and baseline characteristics of patients infected with 2019-nCoV according to corticosteroids therapy

| <b>Characteristics</b>                   | <b>Total<br/>N = 41</b> | <b>Corticosteroids<br/>N = 9</b> | <b>No Corticosteroids<br/>N = 32</b> | <b>P</b> |
|------------------------------------------|-------------------------|----------------------------------|--------------------------------------|----------|
| Fever                                    | 40 (97.6)               | 9 (100.0)                        | 31 (96.9)                            | 0.59     |
| Highest temperature (°C)                 |                         |                                  |                                      | 0.16     |
| < 37.3                                   | 1 (2.4)                 | 0 (0.0)                          | 1 (3.1)                              |          |
| 37.3–38.0                                | 8 (19.5)                | 4 (44.4)                         | 4 (12.5)                             |          |
| 38.1–39.0                                | 18 (43.9)               | 2 (22.2)                         | 16 (50.0)                            |          |
| > 39.0                                   | 14 (34.1)               | 3 (33.3)                         | 11 (34.4)                            |          |
| Cough                                    | 31 (75.6)               | 6 (66.7)                         | 25 (78.1)                            | 0.49     |
| Sputum production                        | 11 (28.2)               | 3 (33.3)                         | 8 (26.7)                             | 0.70     |
| Hemoptysis                               | 2 (5.1)                 | 1 (11.1)                         | 1 (3.3)                              | 0.35     |
| Headache                                 | 3 (7.9)                 | 0 (0.0)                          | 3 (10.3)                             | 0.31     |
| Shortness of breath                      | 22 (55.0)               | 6 (66.7)                         | 16 (51.6)                            | 0.42     |
| Muscle pain / Fatigue                    | 18 (43.9)               | 4 (44.4)                         | 14 (43.8)                            | 0.97     |
| Diarrhea                                 | 1 (2.6)                 | 0 (0.0)                          | 1 (3.4)                              | 0.57     |
| Duration from illness onset to dyspnea   | 8.0 (5.0, 13.0)         | 9.0 (7.0, 18.0)                  | 7.0 (2.0, 13.0)                      | 0.21     |
| Duration from illness onset to admission | 7.0 (4.0, 8.0)          | 7.0 (7.0, 9.0)                   | 6.5 (4.0, 8.0)                       | 0.44     |
| Duration from illness onset to IMV       | 10.5 (7.0, 14.0)        | 10.0 (4.0, 11.0)                 | 17.0 (17.0, 17.0)                    | 0.18     |

| <b>Characteristics</b>               | <b>Total<br/>N = 41</b> | <b>Corticosteroids<br/>N = 9</b> | <b>No Corticosteroids<br/>N = 32</b> | <b>P</b> |
|--------------------------------------|-------------------------|----------------------------------|--------------------------------------|----------|
| WBC count ( $\times 10^9/L$ )        | 6.2 (4.1, 10.5)         | 9.8 (4.5, 12.1)                  | 6.2 (3.8, 10.2)                      | 0.51     |
| $\geq 1.0$                           | 15 (36.6)               | 2 (22.2)                         | 13 (40.6)                            | 0.30     |
| $< 1.0$                              | 26 (63.4)               | 7 (77.8)                         | 19 (59.4)                            |          |
| Neutrophil count ( $\times 10^9/L$ ) | 5.0 (3.3, 8.9)          | 6.9 (5.0, 11.8)                  | 4.9 (3.0, 8.4)                       | 0.12     |
| Lymphocyte count ( $\times 10^9/L$ ) | 0.8 (0.6, 1.1)          | 0.6 (0.2, 0.8)                   | 0.9 (0.6, 1.1)                       | 0.12     |
| $\geq 100$                           | 38 (95.0)               | 9 (100.0)                        | 29 (93.5)                            | 0.43     |
| $< 100$                              | 2 (5.0)                 | 0 (0.0)                          | 2 (6.5)                              |          |
| Hemoglobin, g/dl                     | 126.0 (118.0, 140.0)    | 122.0 (111.0, 128.0)             | 127.5 (119.0, 140.0)                 | 0.31     |
| Platelet count ( $\times 10^9/L$ )   | 164.5 (131.5, 263.0)    | 179.0 (165.0, 301.0)             | 158.0 (129.0, 263.0)                 | 0.24     |
| $\leq 133$                           | 37 (90.2)               | 7 (77.8)                         | 30 (93.8)                            | 0.15     |
| $> 133$                              | 4 (9.8)                 | 2 (22.2)                         | 2 (6.3)                              |          |
| Prothrombin time (s)                 | 11.1 (10.1, 12.4)       | 11.0 (10.3, 20.0)                | 11.1 (10.1, 12.3)                    | 0.44     |
| APTT (s)                             | 27.0 (24.2, 34.1)       | 27.8 (21.7, 49.0)                | 27.0 (24.8, 34.1)                    | 0.96     |
| D-dimer                              | 0.5 (0.3, 1.3)          | 5.6 (1.2, 14.4)                  | 0.5 (0.3, 0.8)                       | 0.0016   |
| Albumin                              | 31.4 (28.9, 36.0)       | 27.9 (26.3, 36.2)                | 32.7 (29.5, 35.9)                    | 0.21     |
| Alanine aminotransferase             | 32.0 (21.0, 50.0)       | 49.0 (26.0, 78.0)                | 30.5 (20.5, 44.0)                    | 0.20     |
| Aspartate aminotransferase           | 34.0 (26.0, 48.0)       | 48.0 (40.0, 59.0)                | 34.0 (24.0, 41.5)                    | 0.061    |

| <b>Characteristics</b> | <b>Total<br/>N = 41</b> | <b>Corticosteroids<br/>N = 9</b> | <b>No Corticosteroids<br/>N = 32</b> | <b>P</b> |
|------------------------|-------------------------|----------------------------------|--------------------------------------|----------|
| ≤ 245                  | 11 (27.5)               | 0 (0.0)                          | 11 (35.5)                            | 0.0095   |
| > 245                  | 29 (72.5)               | 9 (100.0)                        | 20 (64.5)                            |          |
| Total bilirubin        | 11.7 (9.5, 13.9)        | 10.9 (9.8, 32.9)                 | 11.8 (9.4, 13.3)                     | 0.34     |
| Potassium (mmol/L)     | 4.2 (3.8, 4.8)          | 4.3 (3.8, 4.8)                   | 4.2 (3.8, 4.8)                       | 0.76     |
| Sodium (mmol/L)        | 139.0 (137.0, 140.0)    | 138.0 (138.0, 139.0)             | 139.0 (137.0, 140.0)                 | 0.96     |
| Creatinine (μmol/L)    | 74.2 (57.5, 85.7)       | 78.7 (51.7, 106.6)               | 74.0 (57.5, 85.4)                    | 0.90     |
| ≤ 40                   | 26 (63.4)               | 3 (33.3)                         | 23 (71.9)                            | 0.037    |
| > 40                   | 15 (36.6)               | 6 (66.7)                         | 9 (28.1)                             |          |
| Creatine kinase        | 132.5 (62.0, 219.0)     | 379.0 (96.0, 578.0)              | 106.0 (61.0, 189.0)                  | 0.14     |
| PCT < 0.1              | 27 (69.2)               | 5 (62.5)                         | 22 (71.0)                            | 0.20     |
| 0.1 ≤ PCT < 0.25       | 7 (17.9)                | 1 (12.5)                         | 6 (19.4)                             |          |
| 0.25 ≤ PCT < 0.5       | 2 (5.1)                 | 0 (0.0)                          | 2 (6.5)                              |          |
| PCT ≥ 0.5              | 3 (7.7)                 | 2 (25.0)                         | 1 (3.2)                              |          |
| Lactate dehydrogenase  | 286.0 (242.0, 408.0)    | 400.0 (323.0, 464.0)             | 281.0 (236.0, 389.0)                 | 0.015    |
| ≤ 185                  | 27 (67.5)               | 4 (44.4)                         | 23 (74.2)                            | 0.10     |
| > 185                  | 13 (32.5)               | 5 (55.6)                         | 8 (25.8)                             |          |
| Troponin I (pg/ml)     | 3.4 (1.1, 9.1)          | 3.6 (1.7, 209.0)                 | 3.4 (1.0, 5.7)                       | 0.37     |

| <b>Characteristics</b>    | <b>Total<br/>N = 41</b> | <b>Corticosteroids<br/>N = 9</b> | <b>No Corticosteroids<br/>N = 32</b> | <b>P</b> |
|---------------------------|-------------------------|----------------------------------|--------------------------------------|----------|
| Troponin I > 28 (pg/ml)   | 5 (12.2)                | 3 (33.3)                         | 2 (6.3)                              | 0.046    |
| Procalcitonin (ng/ml)     | 0.1 (0.1, 0.1)          | 0.1 (0.1, 0.4)                   | 0.1 (0.1, 0.1)                       | 0.24     |
| Hospitalized              | 7 (17.1)                | 0 (0.0)                          | 7 (21.9)                             | 0.010    |
| Discharge                 | 28 (68.3)               | 5 (55.6)                         | 23 (71.9)                            |          |
| Death                     | 6 (14.6)                | 4 (44.4)                         | 2 (6.3)                              |          |
| Involvement of both lungs | 40 (97.6)               | 9 (100.0)                        | 31 (96.9)                            | 0.59     |
| Days to ICU admission     | 10.5 (8.0, 17.0)        | 9.5 (7.0, 18.0)                  | 13.0 (8.0, 16.0)                     | 0.55     |
| ARDS                      | 12 (29.3)               | 6 (66.7)                         | 6 (18.8)                             | 0.0072   |
| Days to ARDS              | 9.0 (8.0, 14.0)         | 8.5 (7.0, 18.0)                  | 12.0 (8.0, 13.0)                     | 0.71     |
| Shock                     | 3 (7.3)                 | 3 (33.3)                         | 0 (0.0)                              | 0.00069  |
| Acute kidney injury       | 3 (7.3)                 | 3 (33.3)                         | 0 (0.0)                              | 0.00069  |
| CRRT                      | 3 (7.3)                 | 3 (33.3)                         | 0 (0.0)                              | 0.00069  |
| Secondary infection       | 4 (9.8)                 | 3 (33.3)                         | 1 (3.1)                              | 0.0070   |
| Antiviral                 | 38 (92.7)               | 8 (88.9)                         | 30 (93.8)                            | 0.62     |
| Antibiotic therapy        | 41 (100.0)              | 9 (100.0)                        | 32 (100.0)                           | NA       |
| respiratory rate > 24/min | 12 (29.3)               | 5 (55.6)                         | 7 (21.9)                             | 0.058    |
| Oxygen support            |                         |                                  |                                      | 0.017    |

| <b>Characteristics</b> | <b>Total<br/>N = 41</b> | <b>Corticosteroids<br/>N = 9</b> | <b>No Corticosteroids<br/>N = 32</b> | <b><i>P</i></b> |
|------------------------|-------------------------|----------------------------------|--------------------------------------|-----------------|
| ECMO+IMV               | 2 (4.9)                 | 1 (11.1)                         | 1 (3.1)                              |                 |
| IMV                    | 2 (4.9)                 | 2 (22.2)                         | 0 (0.0)                              |                 |
| NIMV/HFNC              | 10 (24.4)               | 3 (33.3)                         | 7 (21.9)                             |                 |
| Nasal cannula          | 27 (65.9)               | 3 (33.3)                         | 24 (75.0)                            |                 |

Data is presented as numbers (%) or median (IQR). *P* values were calculated by chi-square test, Fisher's exact test, or Mann-Whitney U test, where appropriate. ICU=intensive care unit, COPD=chronic obstructive pulmonary disease;

**Supplementary Figure 1. Plasma level of cytokines and chemokines among healthy controls, ICU patients and non-ICU patients**

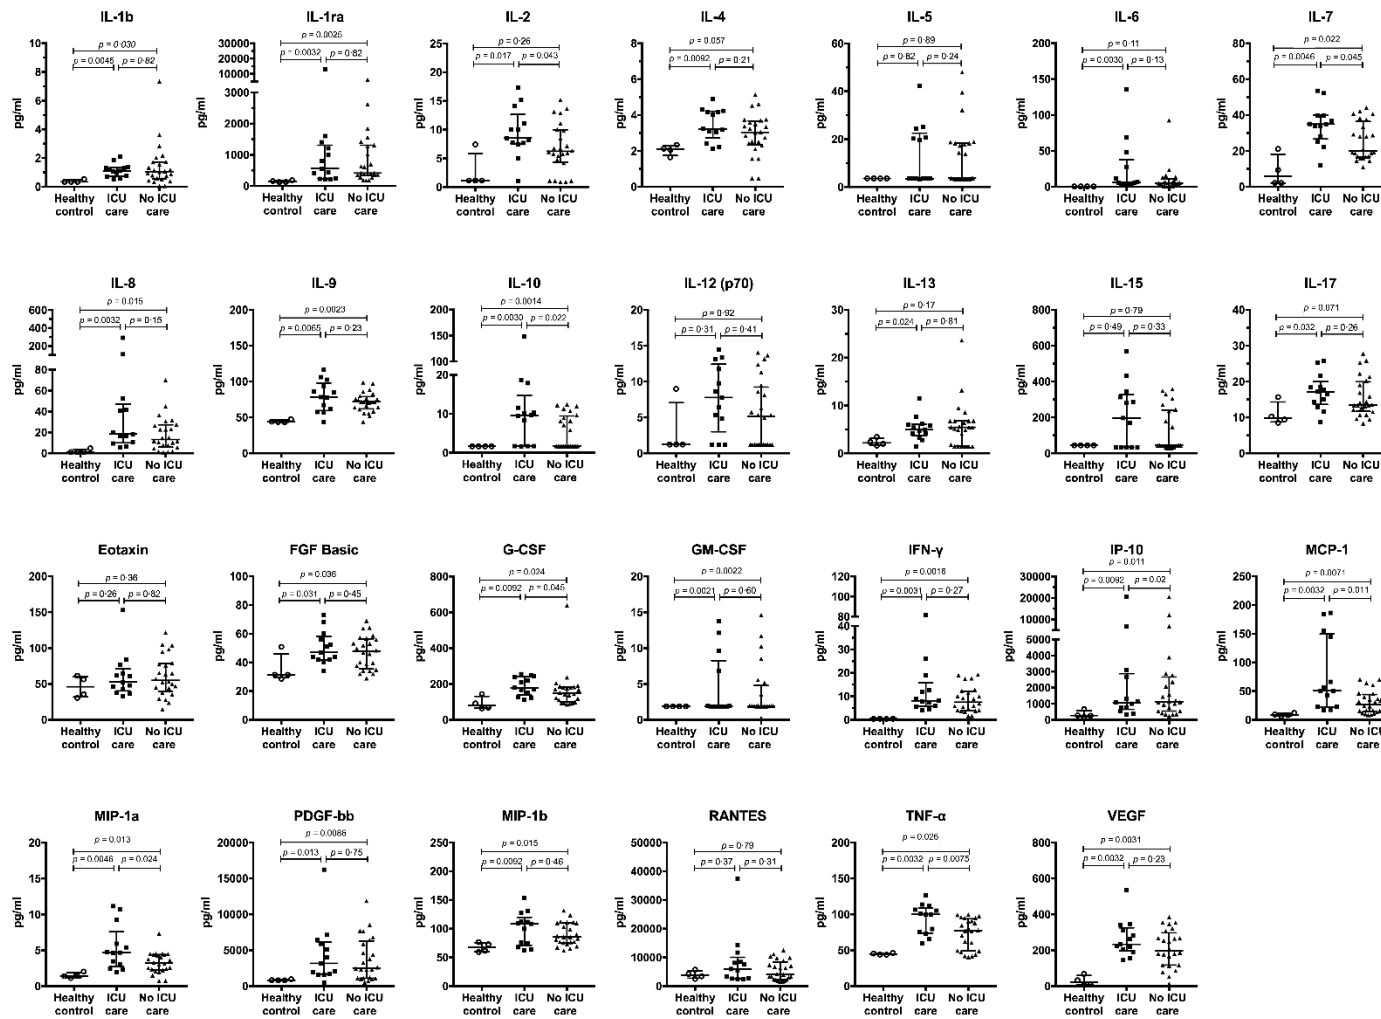

Comparison of cytokine and chemokine levels among 2019-nCoV ICU patients (n=13), non-ICU patients (n=28), and healthy controls. All plasma samples of patients were from the specimens collected for coronavirus detection in blood. The plasma samples were also collected from 4 healthy adults.

The vertical axes differ for each of the mediators to accommodate the extreme variation in the normal distributed range of cytokine concentrations. Data represent median and interquartile range.

IL = interleukin; FGF = fibroblast growth factors; G-CSF = granulocyte colony-stimulating factor; IFN- $\gamma$  = interferon  $\gamma$ ; IP = induced protein; MCP = monocyte chemoattractant protein; MIP = macrophage inflammatory protein; PDGF = platelet derived growth factor; RANTES = regulated on activation and normally T-cell expressed; TNF- $\alpha$  = tumor necrosis factor  $\alpha$ ; VEGF = vascular endothelial growth factor.
